# Supplementary material for: Identification of the CNGC Gene Family in Rice and Mining of Alleles for Application in Rice Improvement
Source: MDPI journal article supplement (doi:10.3390/plants12244089), 2023-12-06
Supplement: s1 [file s1]

# Identification of the CNGC gene family in rice and mining of alleles for application in rice improvement

**Figure A1.** The expression level of the *OsCNGC* genes in different rice tissues under the normal conditions. The plant tissues mainly include aleurone, anther, callus, leaf, panicle, pistil, root, seed and shoot.

**Figure A2.** Haplotype networks of the four cloned CNGC (1~4) genes and their association traits with four agronomic traits in 3KRG. p-values indicate differences among haplotypes assessed by two-factor ANOVA, where different letters on the box-and-line plots indicate statistically significant differences based on the Duncan's Multiple Range Test at  $P < 0.05$ . The bars on the right show the frequency differences in dominant gcHaps between local varieties (LANs) and modern varieties (MVs) in Xi'an and Geng. The chi-square test was used to determine significant differences in the proportions of the same gcHap between groups \*\*\*\* $P < 0.0001$ , \*\*\* $P < 0.001$ , \*\* $P < 0.01$ , \* $P < 0.05$  and N.S., not significant.

**Figure A3.** Haplotype networks of the four cloned CNGC(5~8) genes and their association traits with four agronomic traits in 3KRG. p-values indicate differences among haplotypes assessed by two-factor ANOVA, where different letters on the box-and-line plots indicate statistically significant differences based on the Duncan's Multiple Range Test at  $P < 0.05$ . The bars on the right show the frequency differences in dominant gcHaps between local varieties (LANs) and modern varieties (MVs) in Xi'an and Geng. The chi-square test was used to determine significant differences in the proportions of the same gcHap between groups \*\*\*\* $P < 0.0001$ , \*\*\* $P < 0.001$ , \*\* $P < 0.01$ , \* $P < 0.05$  and N.S., not significant.

**Figure A4.** Haplotype networks of the four cloned CNGC(10~12,15) genes and their association traits with four agronomic traits in 3KRG. p-values indicate differences among haplotypes assessed by two-factor ANOVA, where different letters on the box-and-line plots indicate statistically significant differences based on the Duncan's Multiple Range Test at  $P < 0.05$ . The bars on the right show the frequency differences in dominant gcHaps between local varieties (LANs) and modern varieties (MVs) in Xi'an and Geng. The chi-square test was used to determine significant differences in the proportions of the same gcHap between groups \*\*\*\* $P < 0.0001$ , \*\*\* $P < 0.001$ , \*\* $P < 0.01$ , \* $P < 0.05$  and N.S., not significant.

**Figure A5.** Comparison and analysis of 15 agronomic traits among the predominant gcHap, unfavorable gcHap, and major gcHaps of *OsCNGC1*

**Figure A6.** Comparison and analysis of 15 agronomic traits among the predominant gcHap, unfavorable gcHap, and major gcHaps of *OsCNGC2*

**Figure A7.** Comparison and analysis of 15 agronomic traits among the predominant gcHap, unfavorable gcHap, and major gcHaps of *OsCNGC3*

**Figure A8.** Comparison and analysis of 15 agronomic traits among the predominant gcHap, unfavorable gcHap, and major gcHaps of *OsCNGC4*

**Figure A9.** Comparison and analysis of 15 agronomic traits among the predominant gcHap, unfavorable gcHap, and major gcHaps of *OsCNGC5*

**Figure A10.** Comparison and analysis of 15 agronomic traits among the predominant gcHap, unfavorable gcHap, and major gcHaps of *OsCNGC6*

**Figure A11.** Comparison and analysis of 15 agronomic traits among the predominant gcHap, unfavorable gcHap, and major gcHaps of *OsCNGC7*

**Figure A12.** Comparison and analysis of 15 agronomic traits among the predominant gcHap, unfavorable gcHap, and major gcHaps of *OsCNGC8*

**Figure A13.** Comparison and analysis of 15 agronomic traits among the predominant gcHap, unfavorable gcHap, and major gcHaps of *OsCNGC9*

**Figure A14.** Comparison and analysis of 15 agronomic traits among the predominant gcHap, unfavorable gcHap, and major gcHaps of *OsCNGC10*

**Figure A15.** Comparison and analysis of 15 agronomic traits among the predominant gcHap, unfavorable gcHap, and major gcHaps of *OsCNGC11*

**Figure A16.** Comparison and analysis of 15 agronomic traits among the predominant gcHap, unfavorable gcHap, and major gcHaps of *OsCNGC12*

**Figure A17.** Comparison and analysis of 15 agronomic traits among the predominant gcHap, unfavorable gcHap, and major gcHaps of *OsCNGC13*

**Figure A18.** Comparison and analysis of 15 agronomic traits among the predominant gcHap, unfavorable gcHap, and major gcHaps of *OsCNGC14*

**Figure A19.** Comparison and analysis of 15 agronomic traits among the predominant gcHap, unfavorable gcHap, and major gcHaps of *OsCNGC15*

**Figure A20.** Comparison and analysis of 15 agronomic traits among the predominant gcHap, unfavorable gcHap, and major gcHaps of *OsCNGC16*

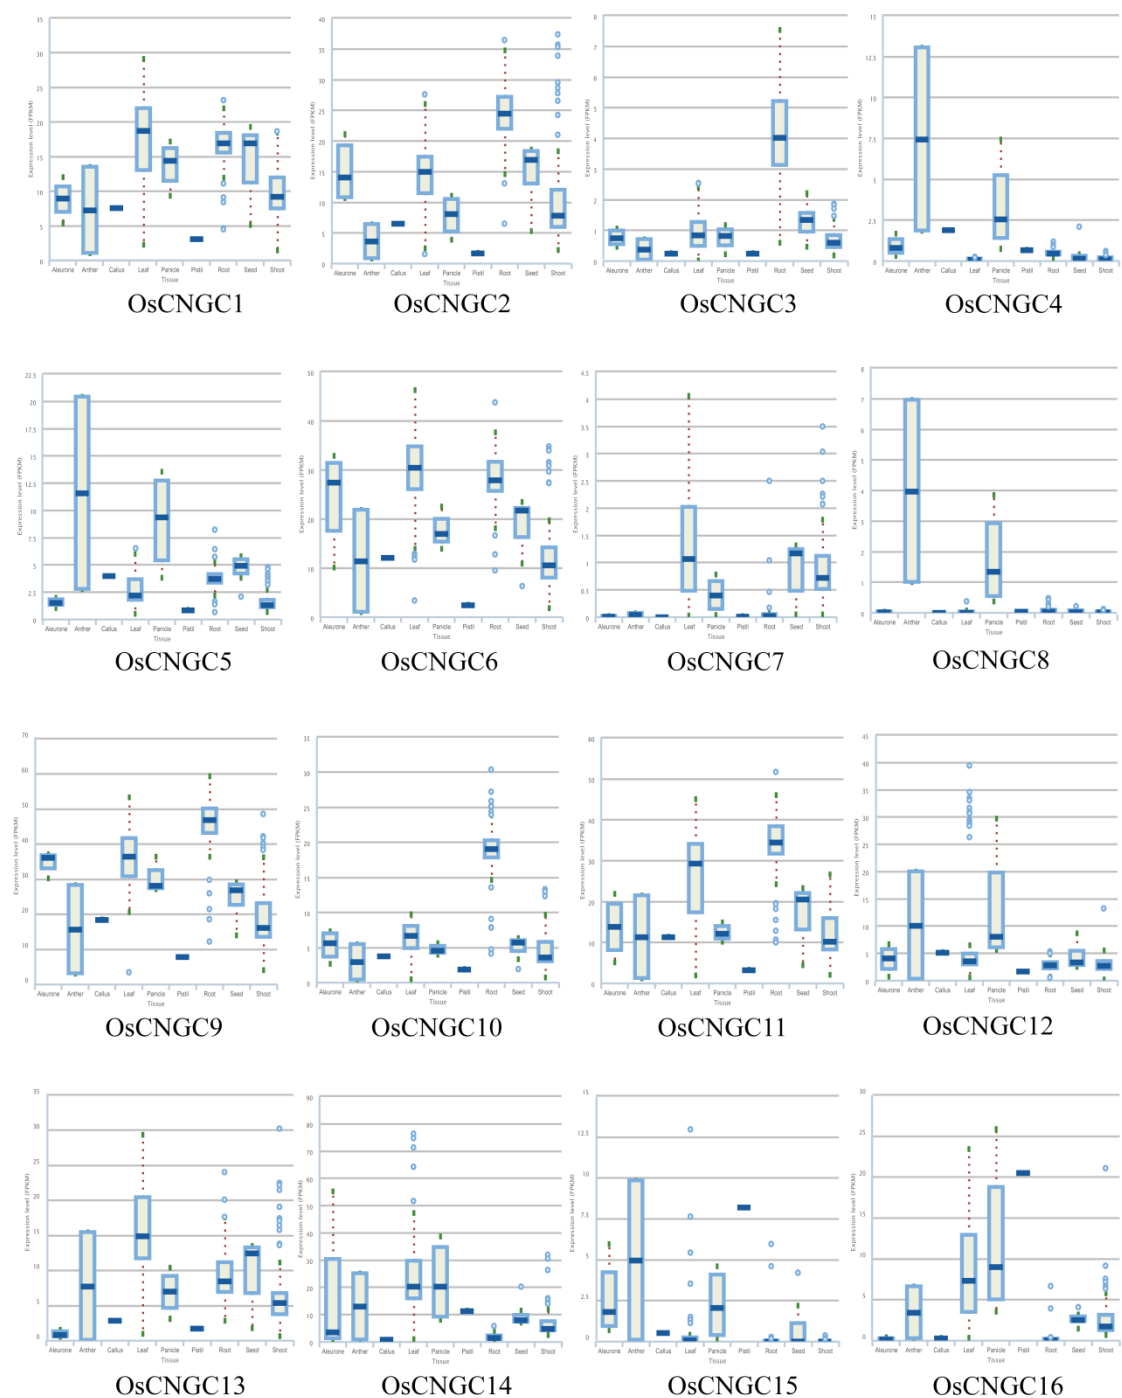

**Figure A1.** The expression level of the *OsCNGC* genes in different rice tissues under the normal conditions. The plant tissues mainly include aleurone, anther, callus, leaf, panicle, pistil, root, seed and shoot.

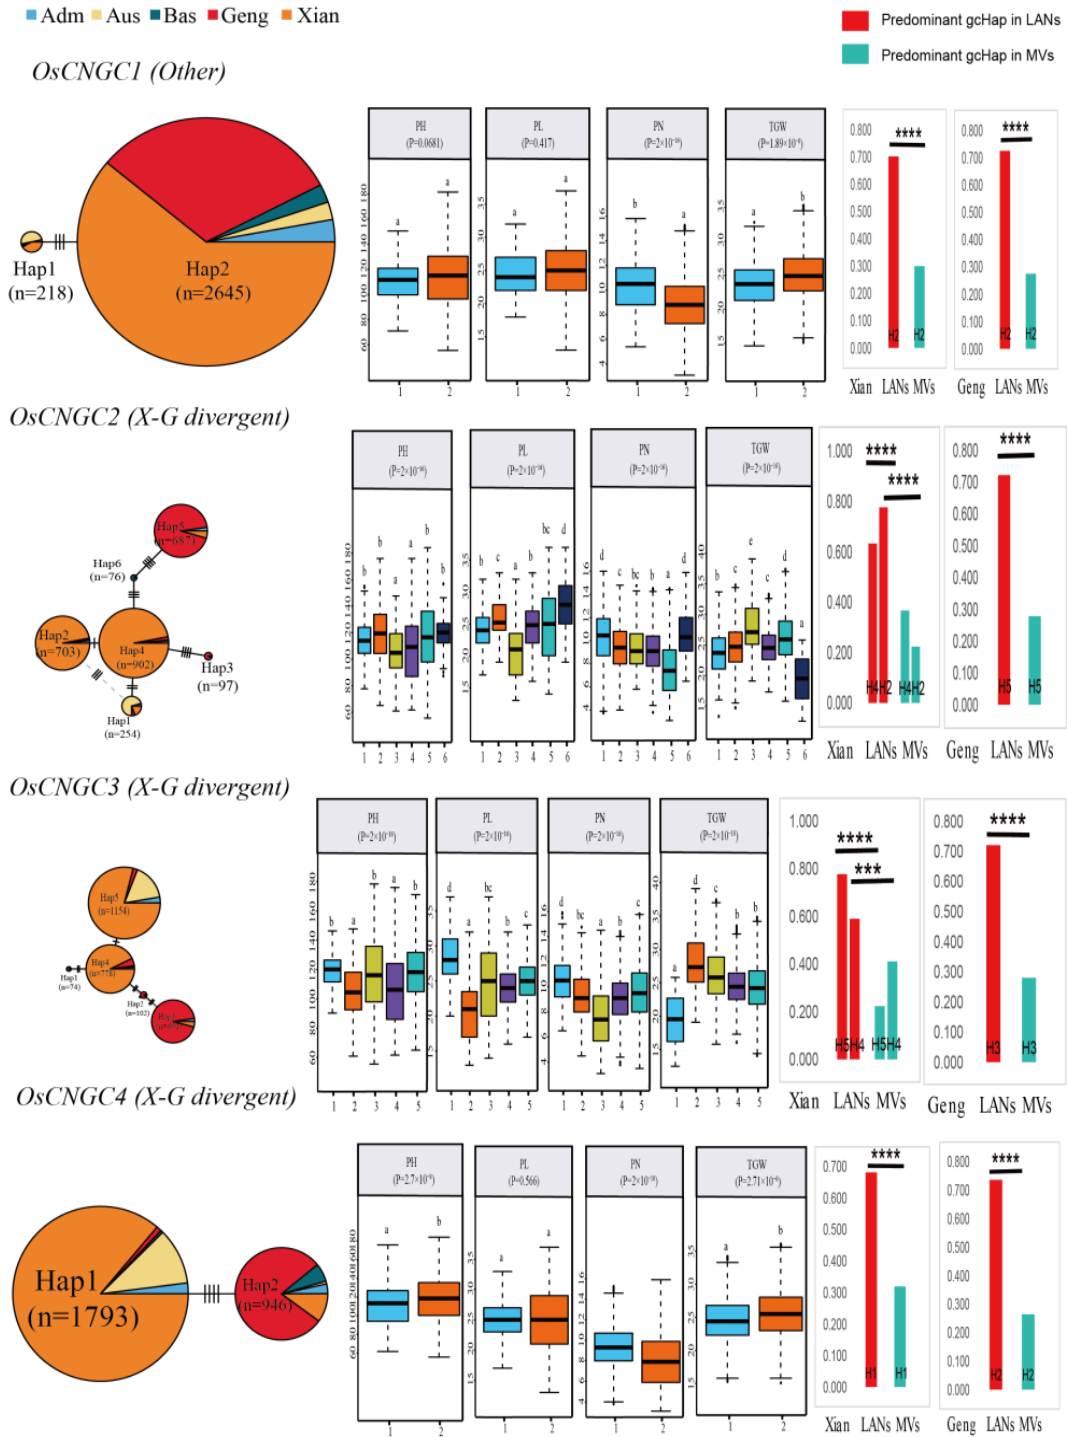

**Figure A2.** Haplotype networks of the four cloned *CNGC* (1~4) genes and their association traits with four agronomic traits in 3KRG. p-values indicate differences among haplotypes assessed by two-factor ANOVA, where different letters on the box-and-line plots indicate statistically significant differences based on the Duncan's Multiple Range Test at  $P < 0.05$ . The bars on the right show the frequency differences in dominant gcHaps between local varieties (LANs) and modern varieties (MV) in Xi'an and Geng. The chi-square test was used to determine significant differences in the proportions of the same gcHap between groups \*\*\*\* $P < 0.0001$ , \*\*\* $P < 0.001$ , \*\* $P < 0.01$ , \* $P < 0.05$  and N.S., not significant.

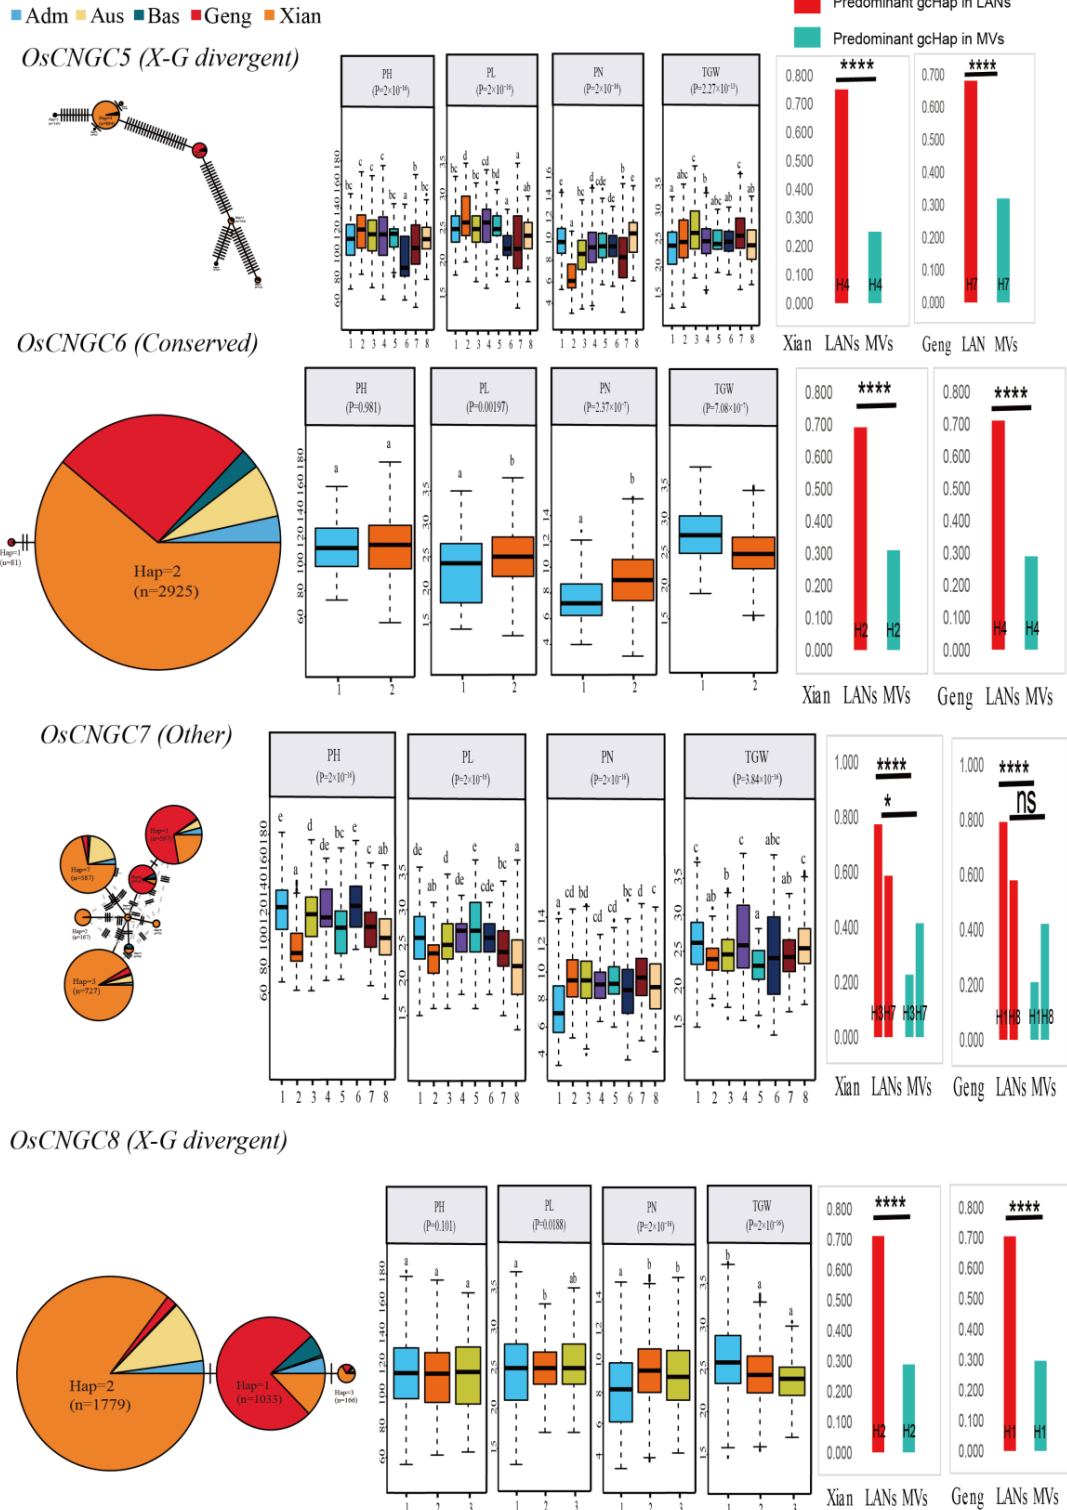

**Figure A3.** Haplotype networks of the four cloned *CNGC* (5~8) genes and their association traits with four agronomic traits in 3KRG. p-values indicate differences among haplotypes assessed by two-factor ANOVA, where different letters on the box-and-line plots indicate statistically significant differences based on the Duncan's Multiple Range Test at  $P < 0.05$ . The bars on the right show the frequency differences in dominant gCHaps between local varieties (LANs) and modern varieties (MVs) in Xi'an and Geng. The chi-square test was used to determine significant differences in the proportions of the same gCHap between groups \*\*\*\* $P < 0.0001$ , \*\*\* $P < 0.001$ , \*\* $P < 0.01$ , \* $P < 0.05$  and N.S., not significant.

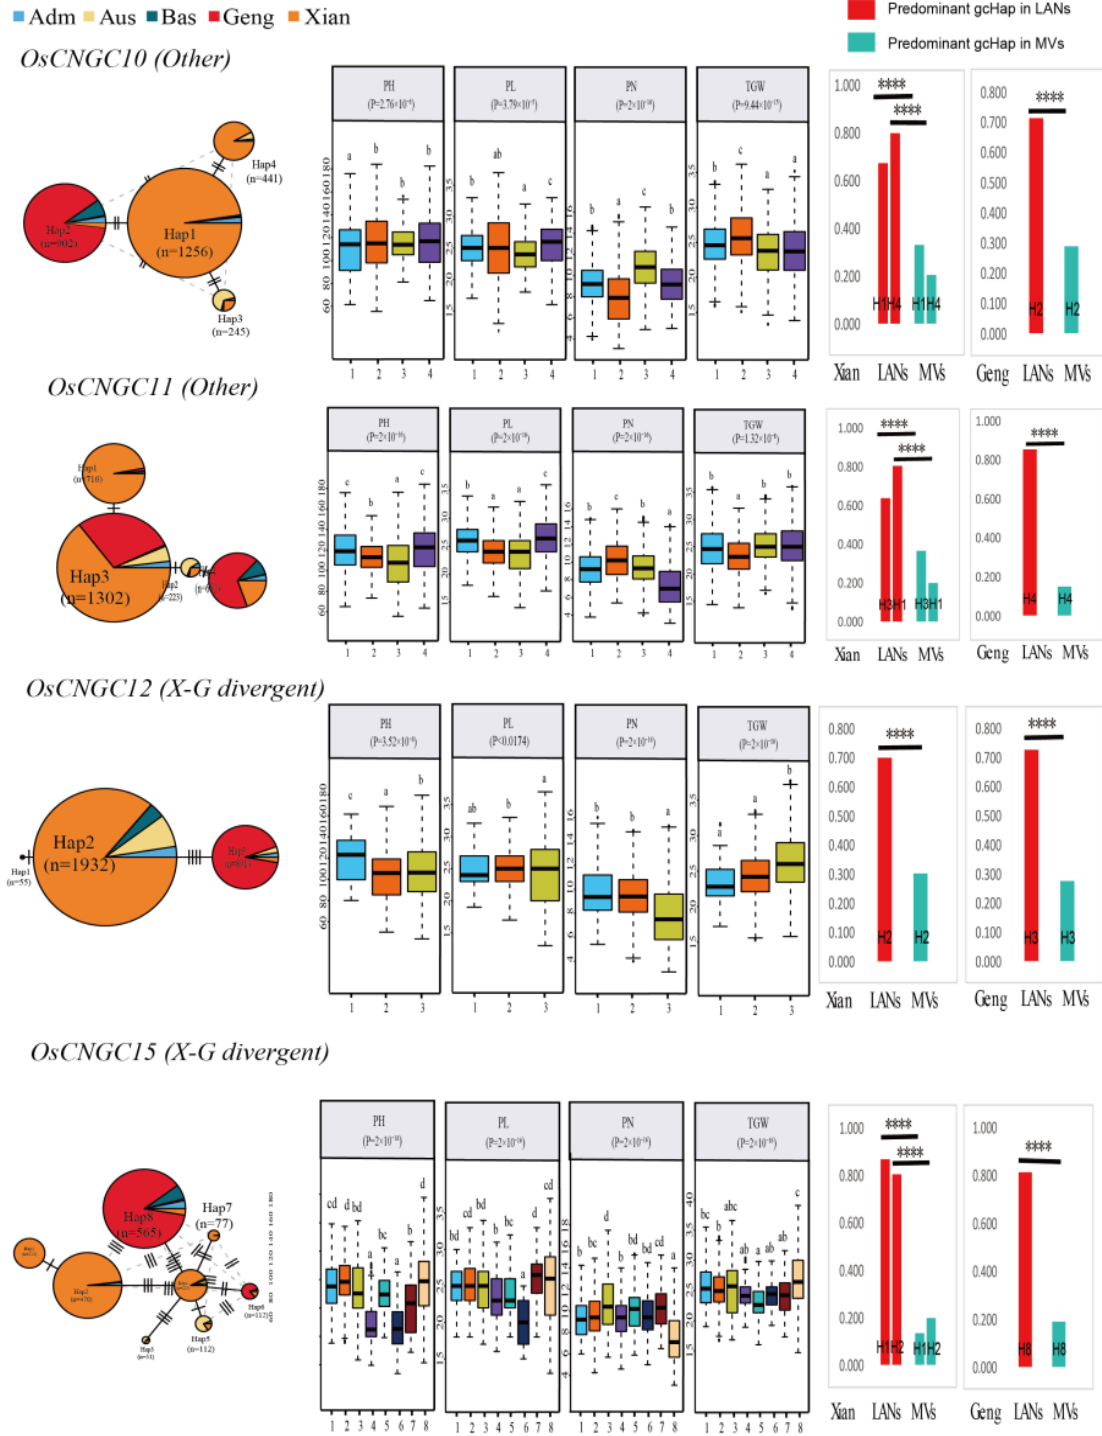

**Figure A4.** Haplotype networks of the four cloned *CNGC* (10~12,15) genes and their association traits with four agronomic traits in 3KRG. p-values indicate differences among haplotypes assessed by two-factor ANOVA, where different letters on the box-and-line plots indicate statistically significant differences based on the Duncan's Multiple Range Test at  $P<0.05$ . The bars on the right show the frequency differences in dominant gHaps between local varieties (LANs) and modern varieties (MV) in Xi'an and Geng. The chi-square test was used to determine significant differences in the proportions of the same gHap between groups \*\*\*\* $P<0.0001$ , \*\*\* $P<0.001$ , \*\* $P<0.01$ , \* $P<0.05$  and N.S., not significant.

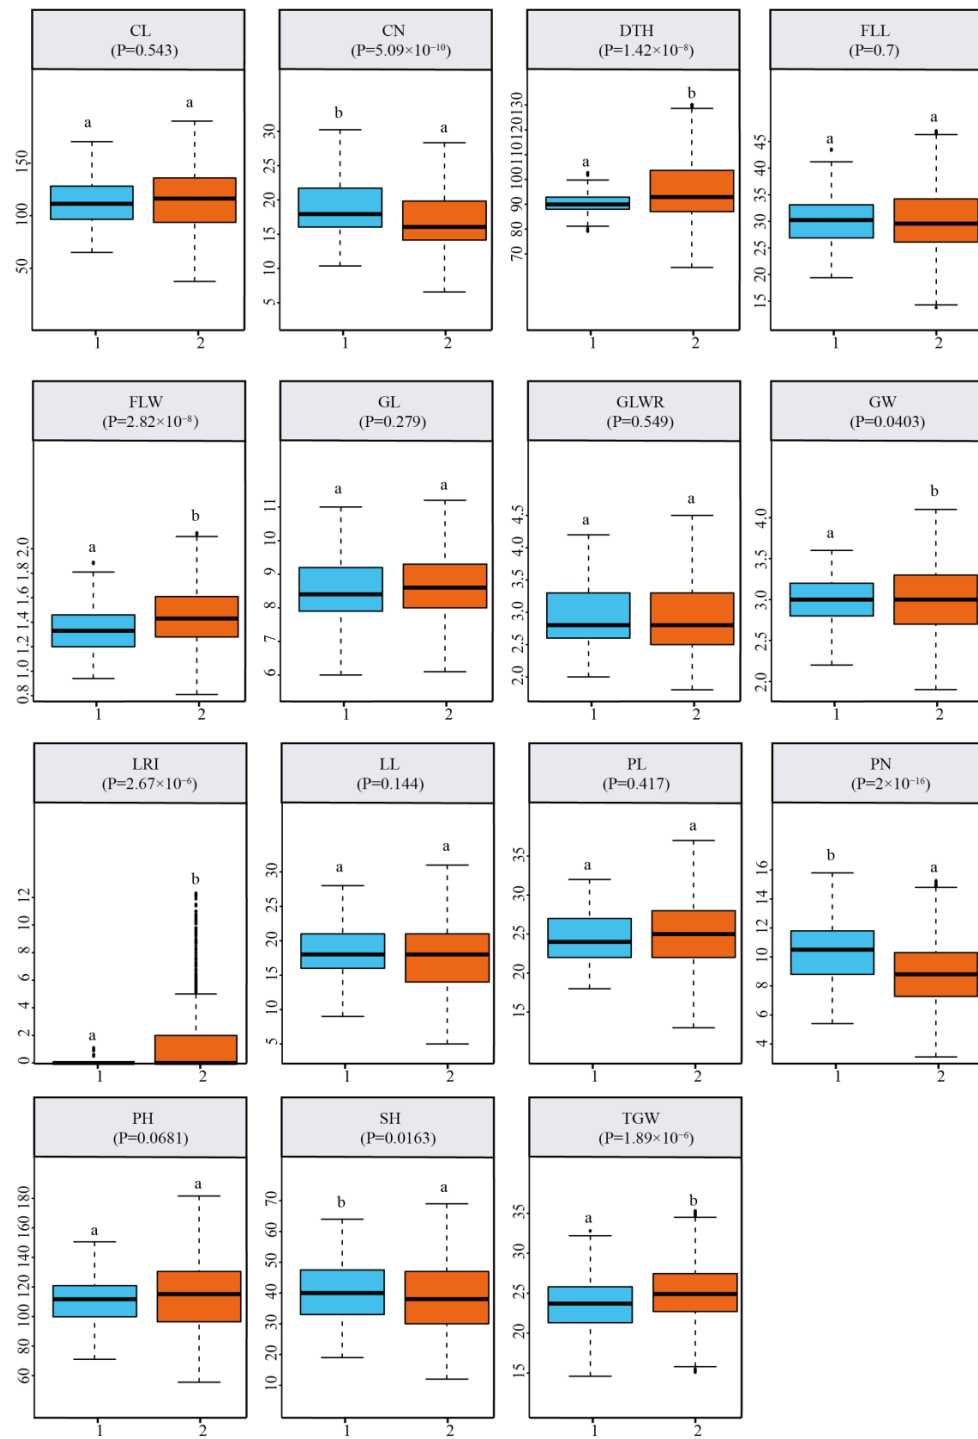

**Figure A5.** Comparison and analysis of 15 agronomic traits among the predominant gCHap, unfavorable gCHap, and major gCHaps of *OsCNGC1*

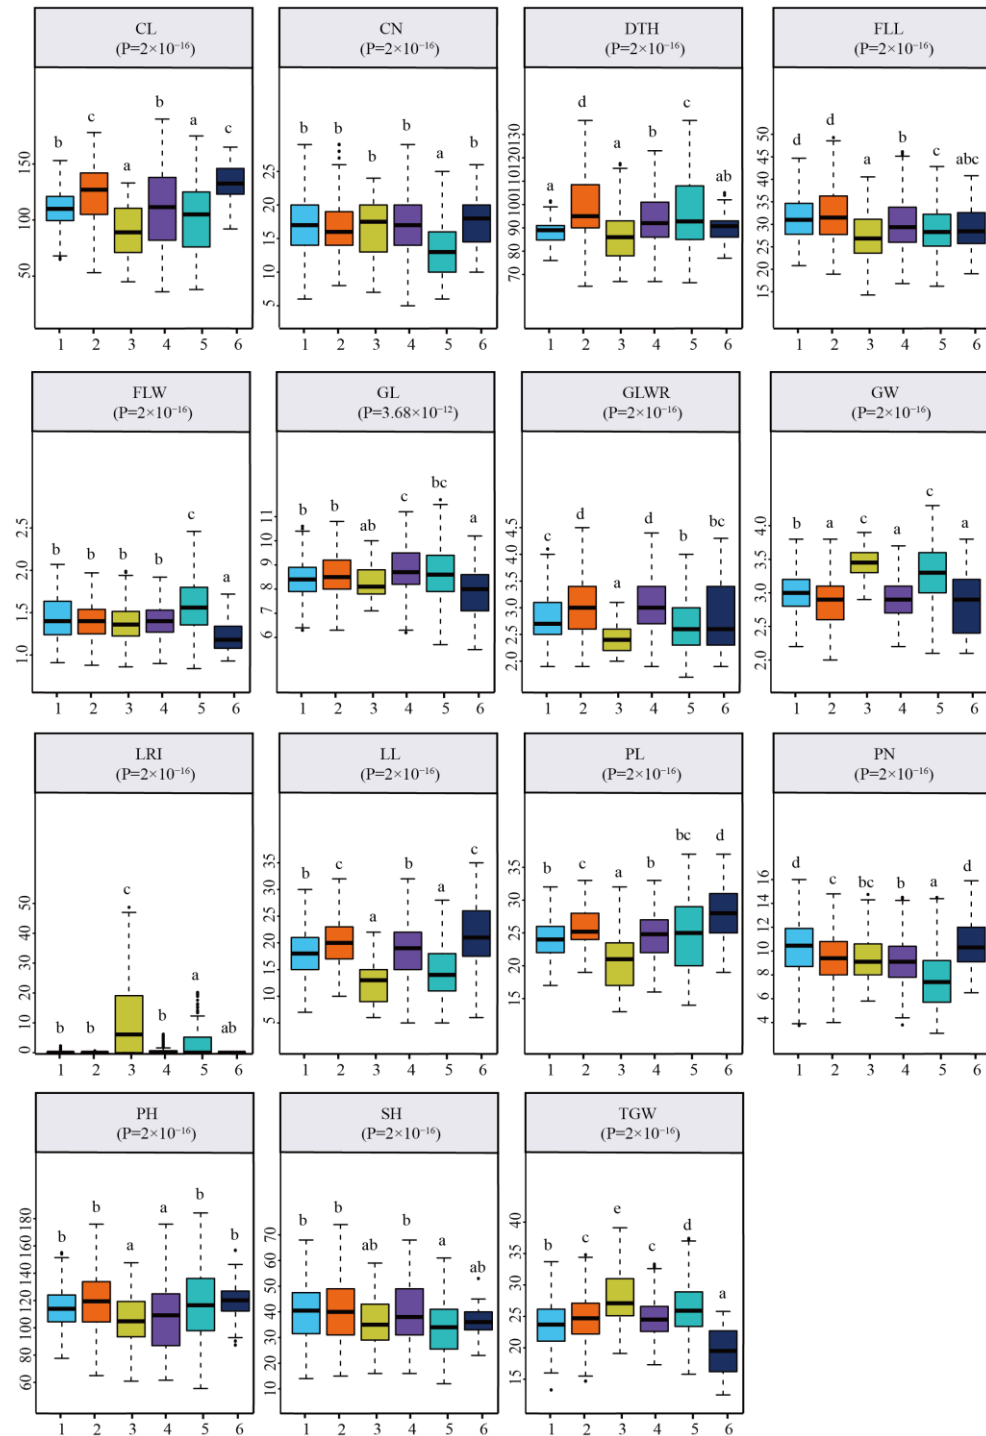

**Figure A6.** Comparison and analysis of 15 agronomic traits among the predominant gCHap, unfavorable gCHap, and major gCHap of *OsCNGC2*



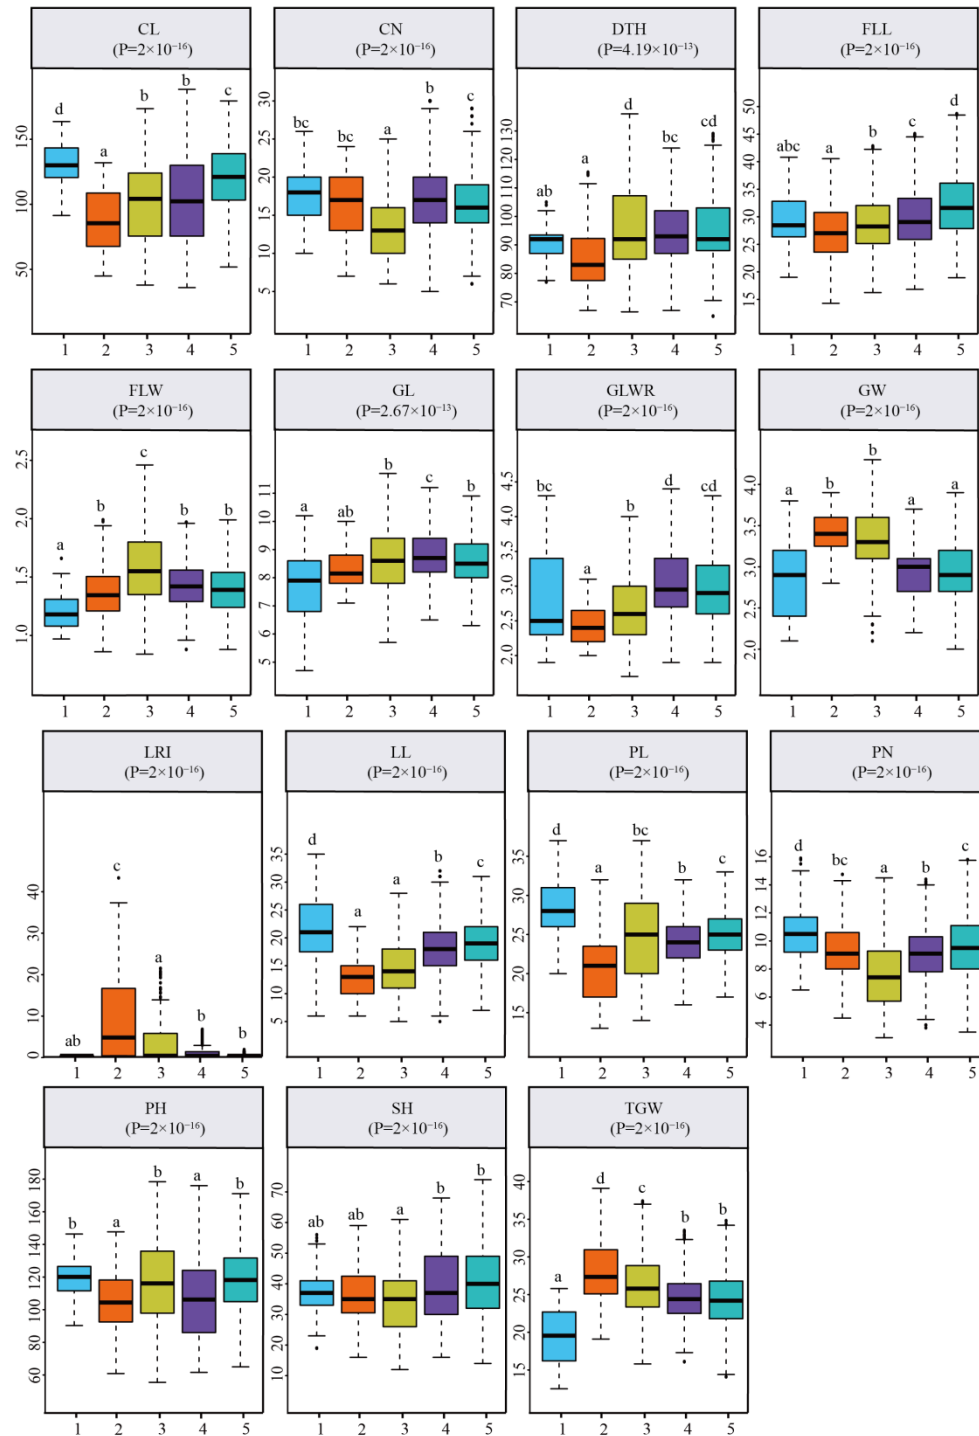

**Figure A7.** Comparison and analysis of 15 agronomic traits among the predominant gcHap, unfavorable gcHap, and major gcHaps of *OsCNGC3*

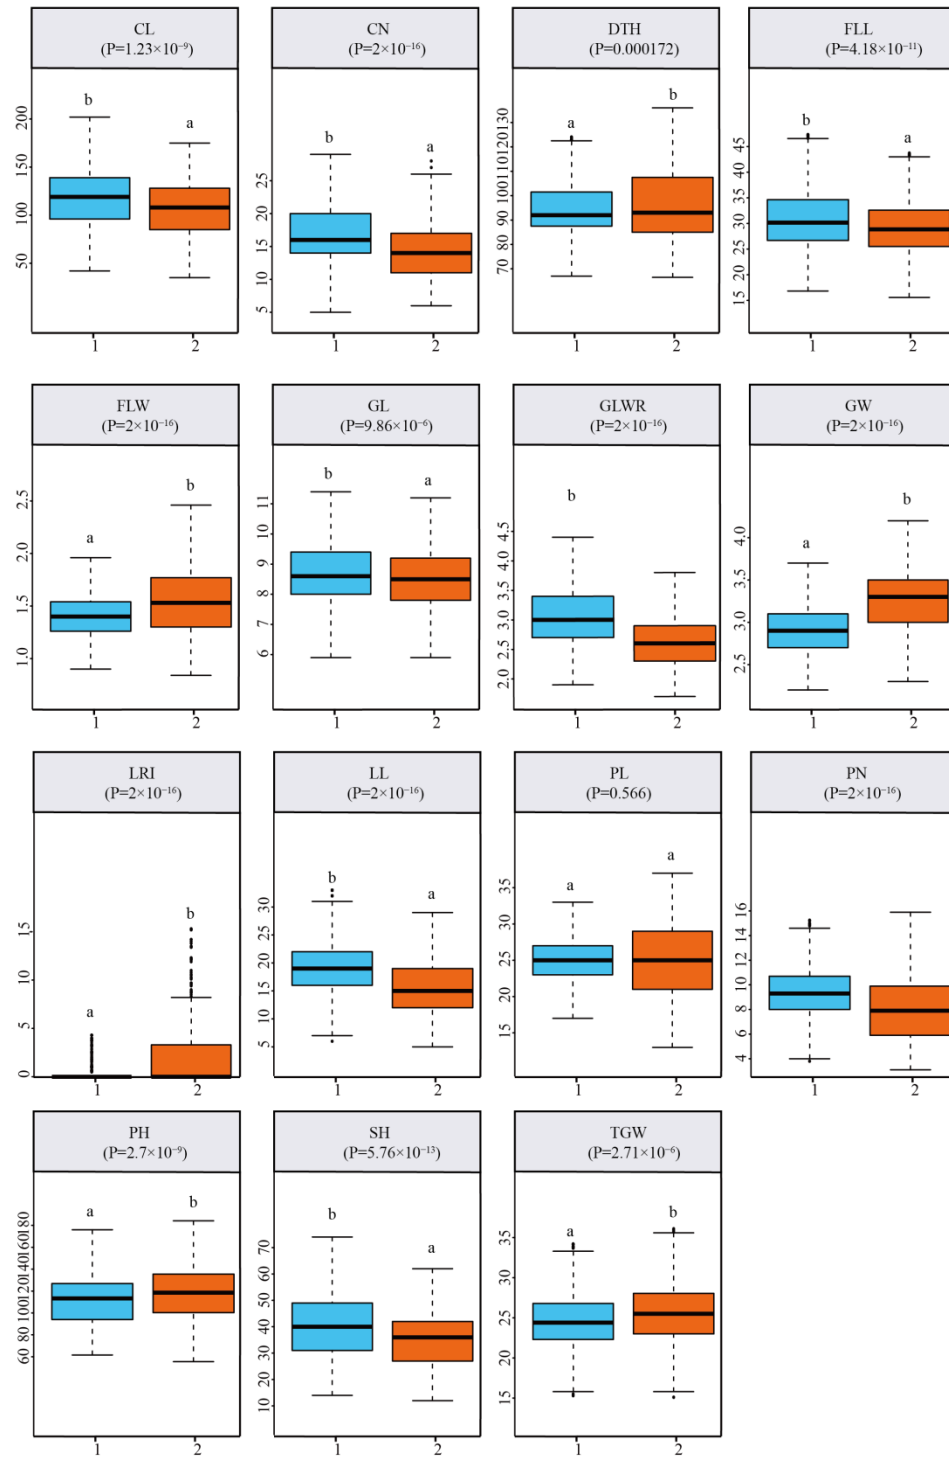

**Figure A8.** Comparison and analysis of 15 agronomic traits among the predominant gcHap, unfavorable gcHap, and major gcHaps of *OsCNGC4*

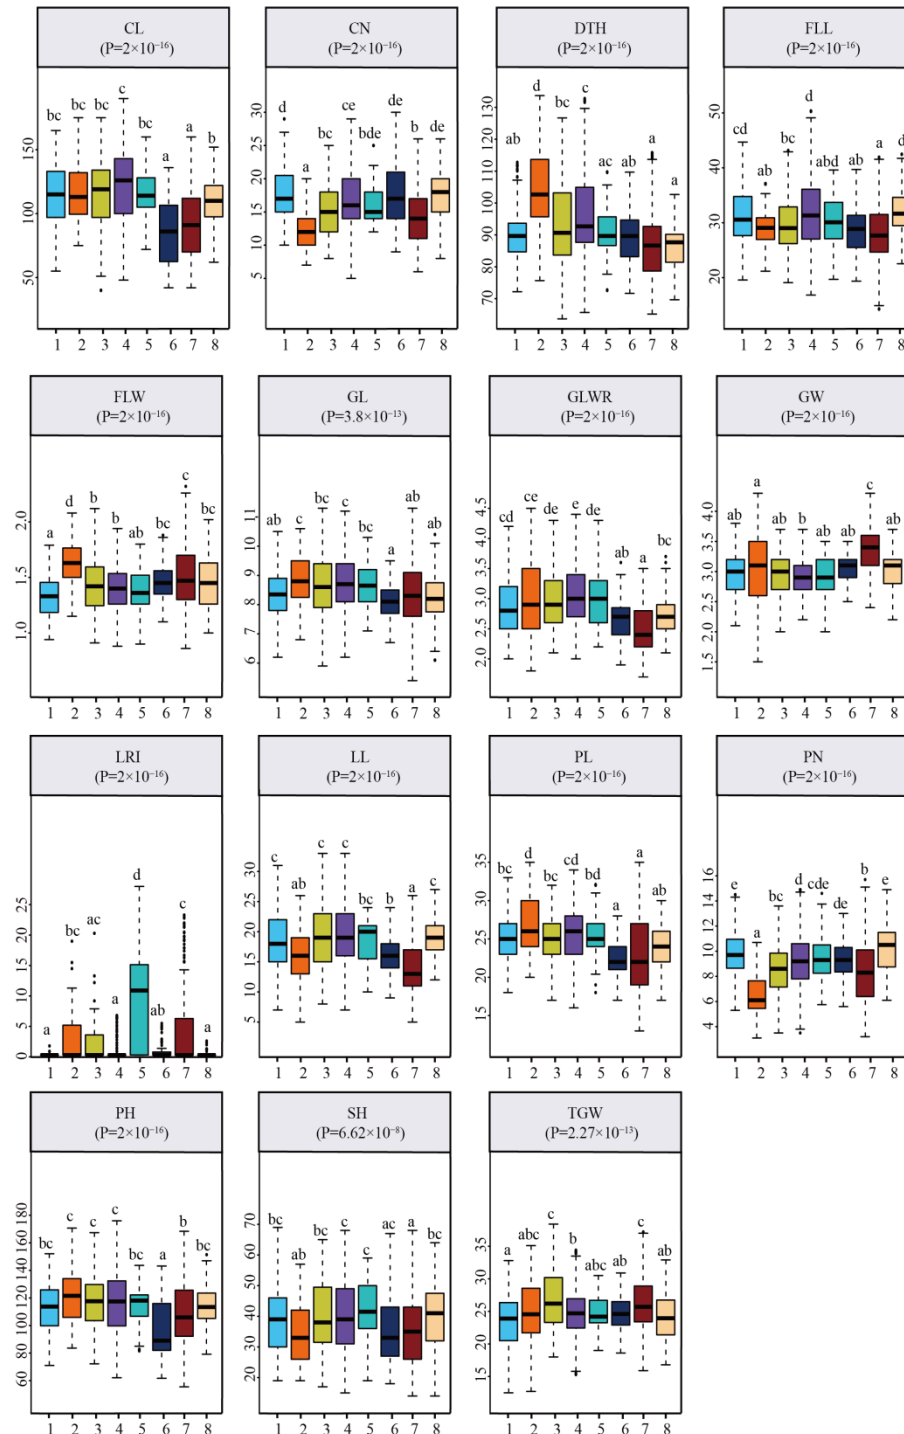

**Figure A9.** Comparison and analysis of 15 agronomic traits among the predominant gcHap, unfavorable gcHap, and major gcHaps of *OsCNGC5*

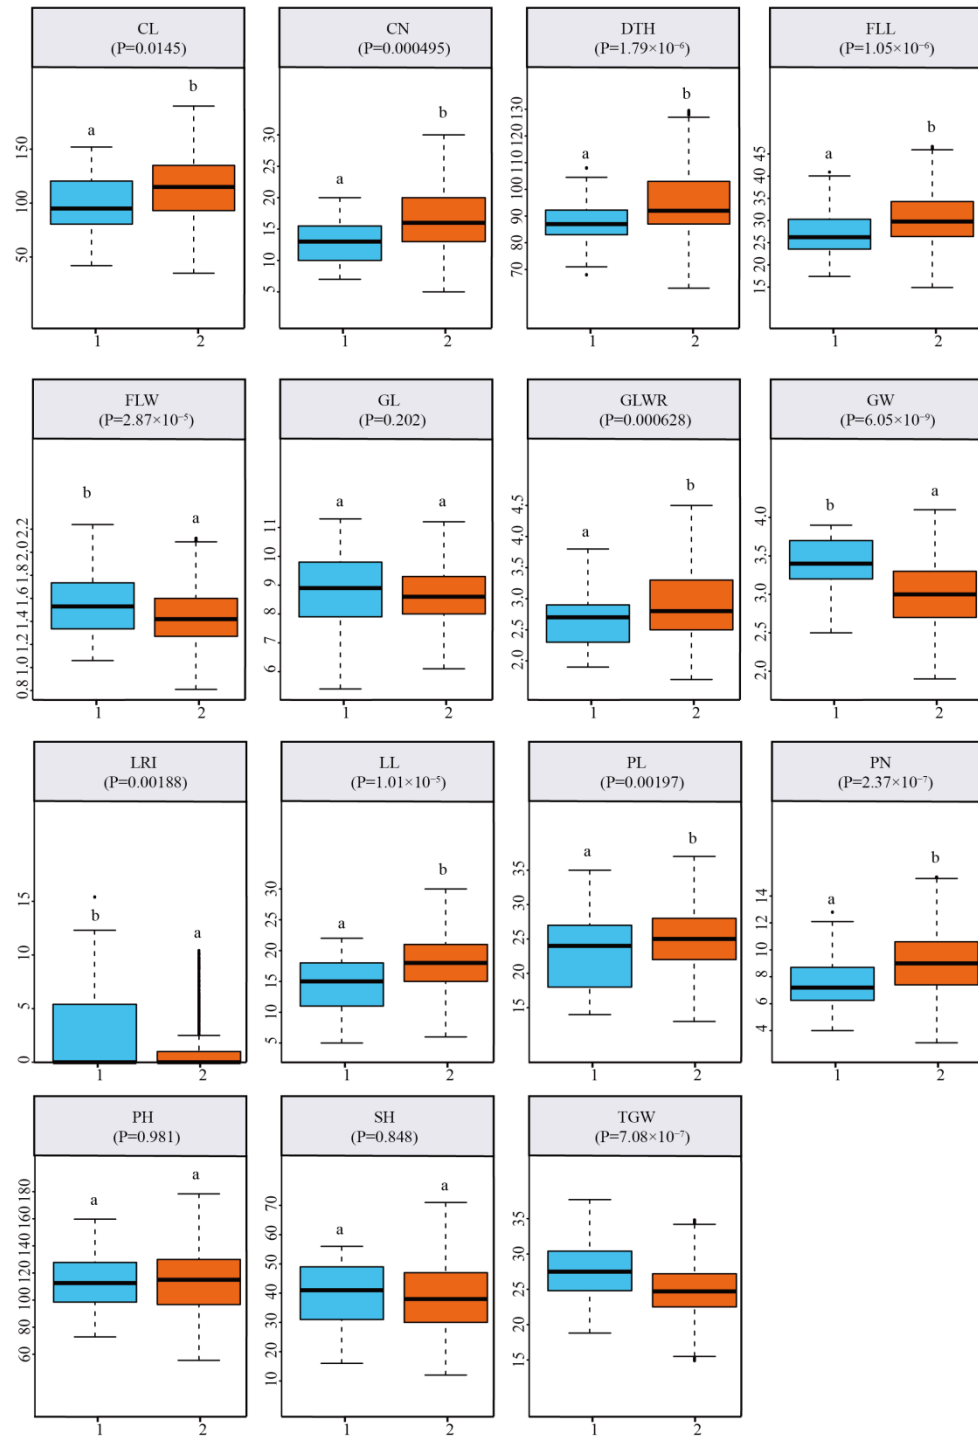

**Figure A10.** Comparison and analysis of 15 agronomic traits among the predominant gcHap, unfavorable gcHap, and major gcHaps of *OsCNGC6*

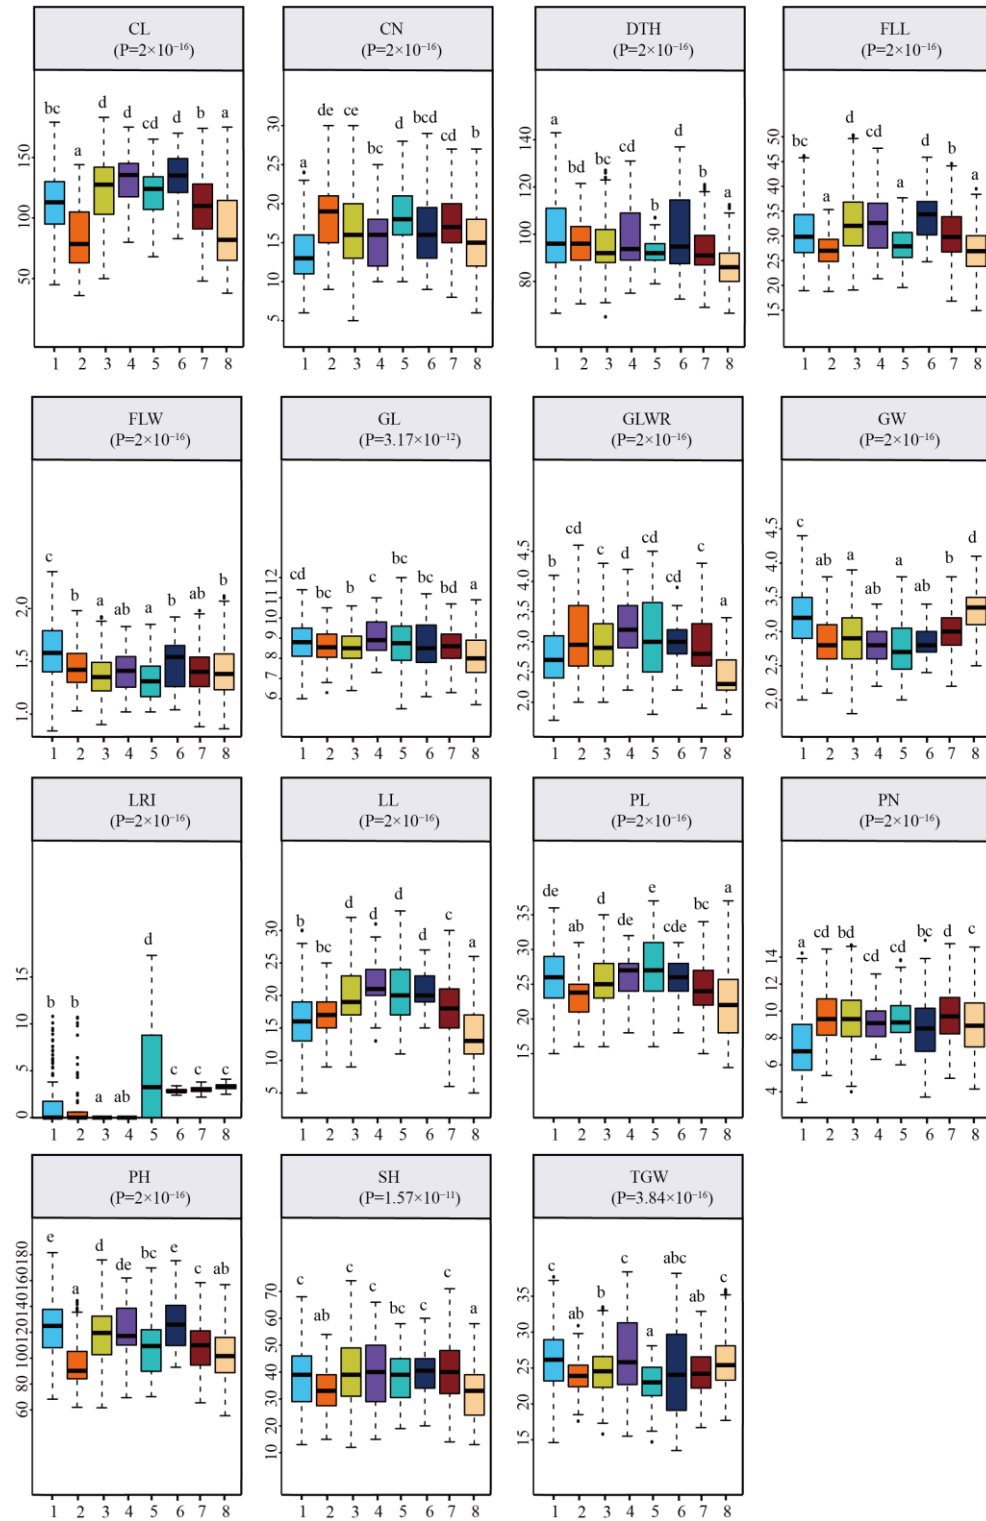

**Figure A11.** Comparison and analysis of 15 agronomic traits among the predominant gcHap, unfavorable gcHap, and major gcHaps of *OsCNGC7*

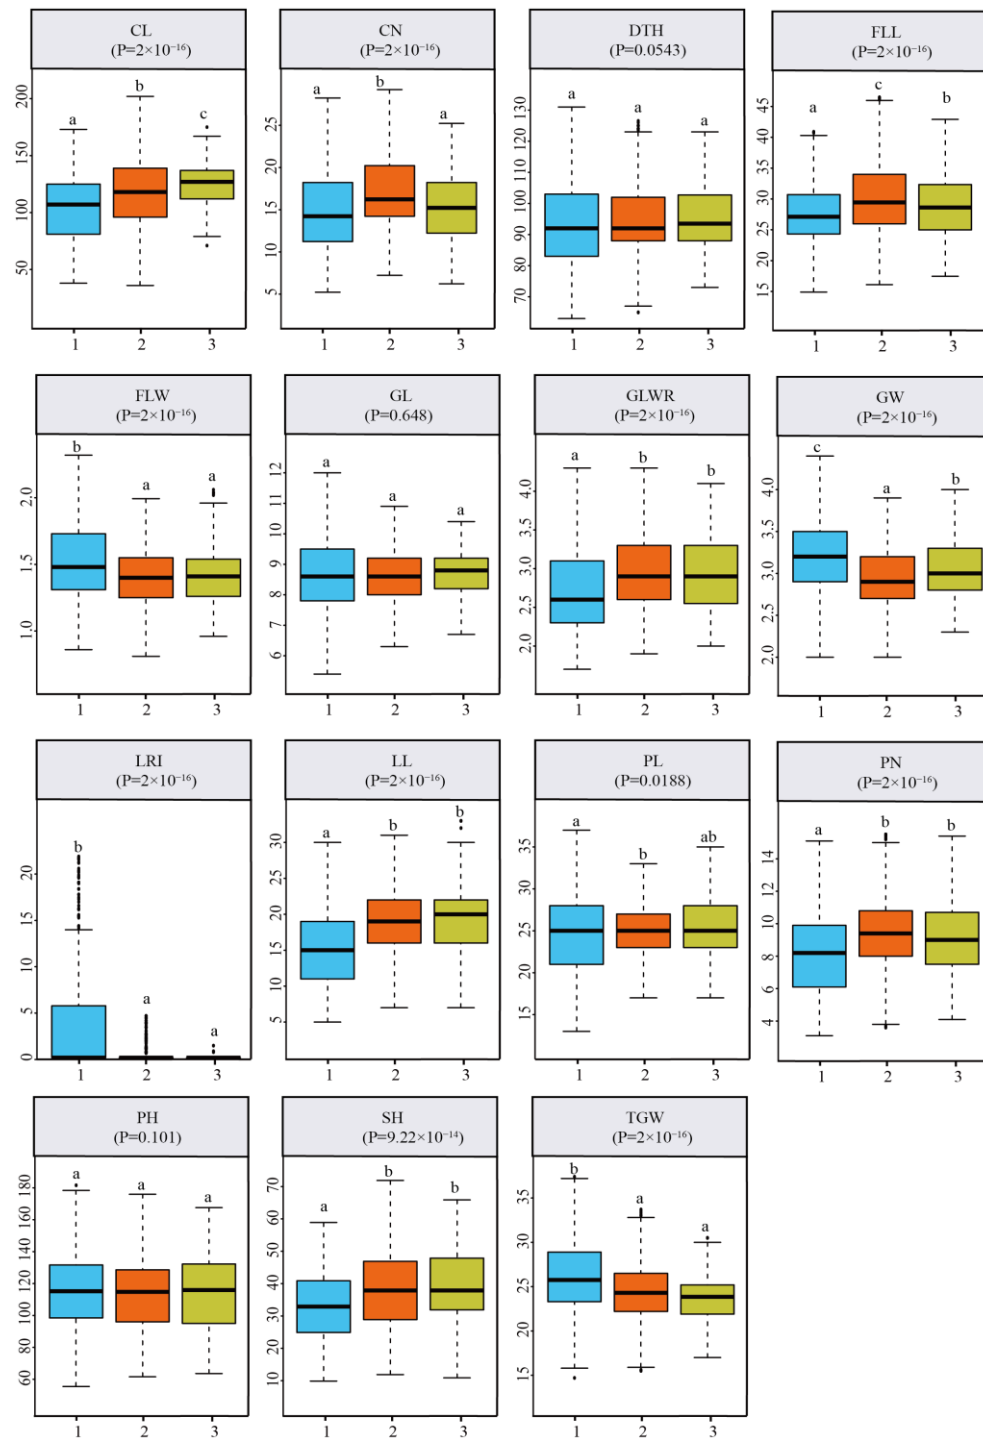

**Figure A12.** Comparison and analysis of 15 agronomic traits among the predominant gcHap, unfavorable gcHap, and major gcHaps of *OsCNGC8*

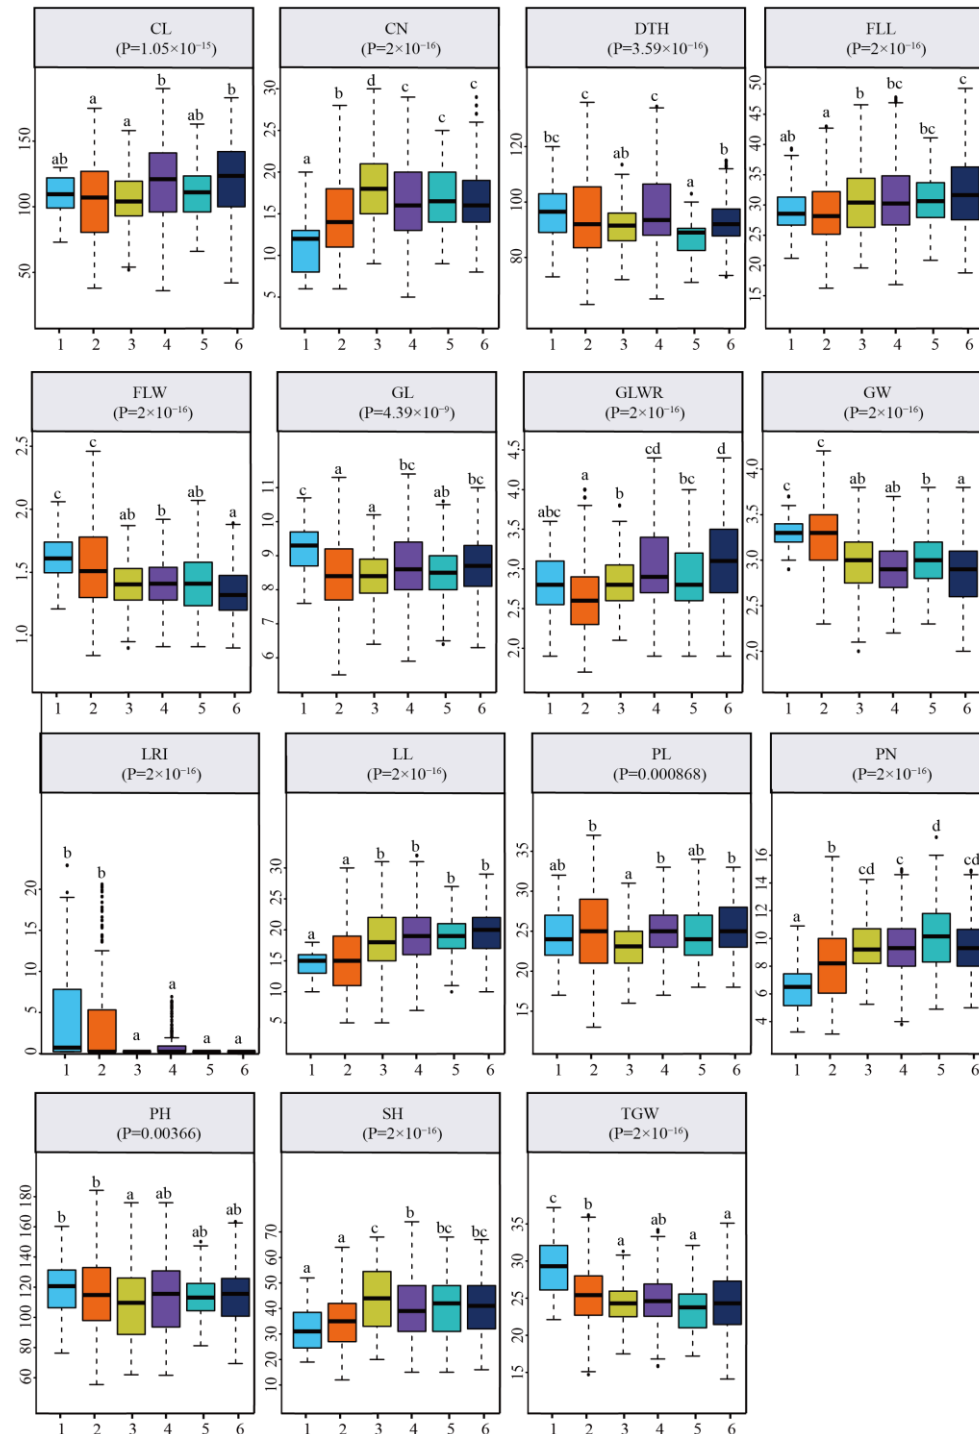

**Figure A13.** Comparison and analysis of 15 agronomic traits among the predominant gcHap, unfavorable gcHap, and major gcHaps of *OsCNGC9*

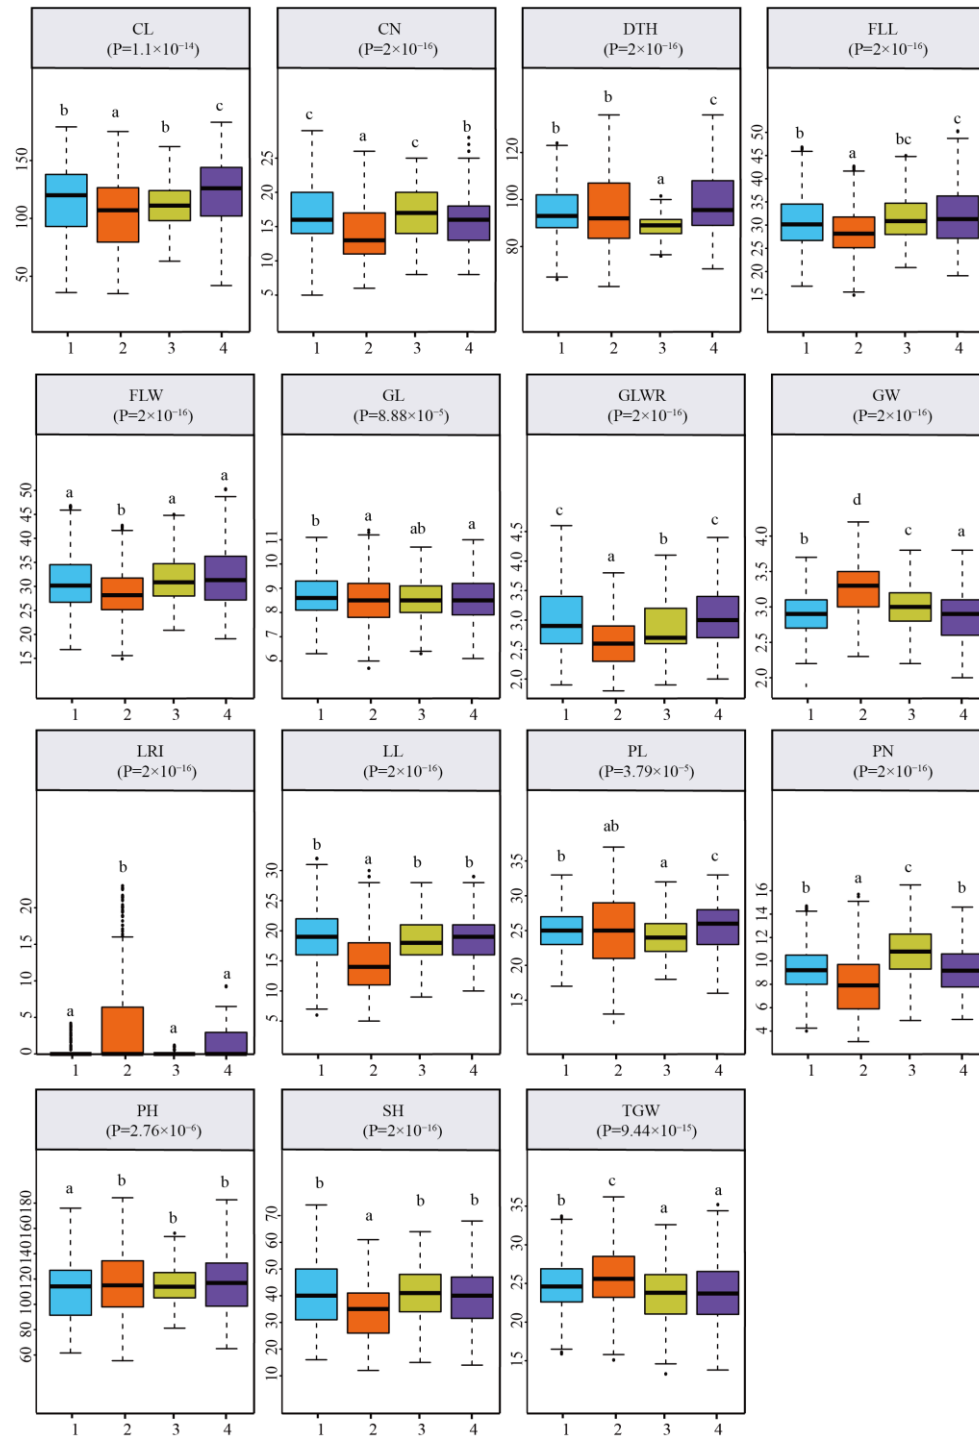

**Figure A14.** Comparison and analysis of 15 agronomic traits among the predominant gcHap, unfavorable gcHap, and major gcHaps of *OsCNGC10*



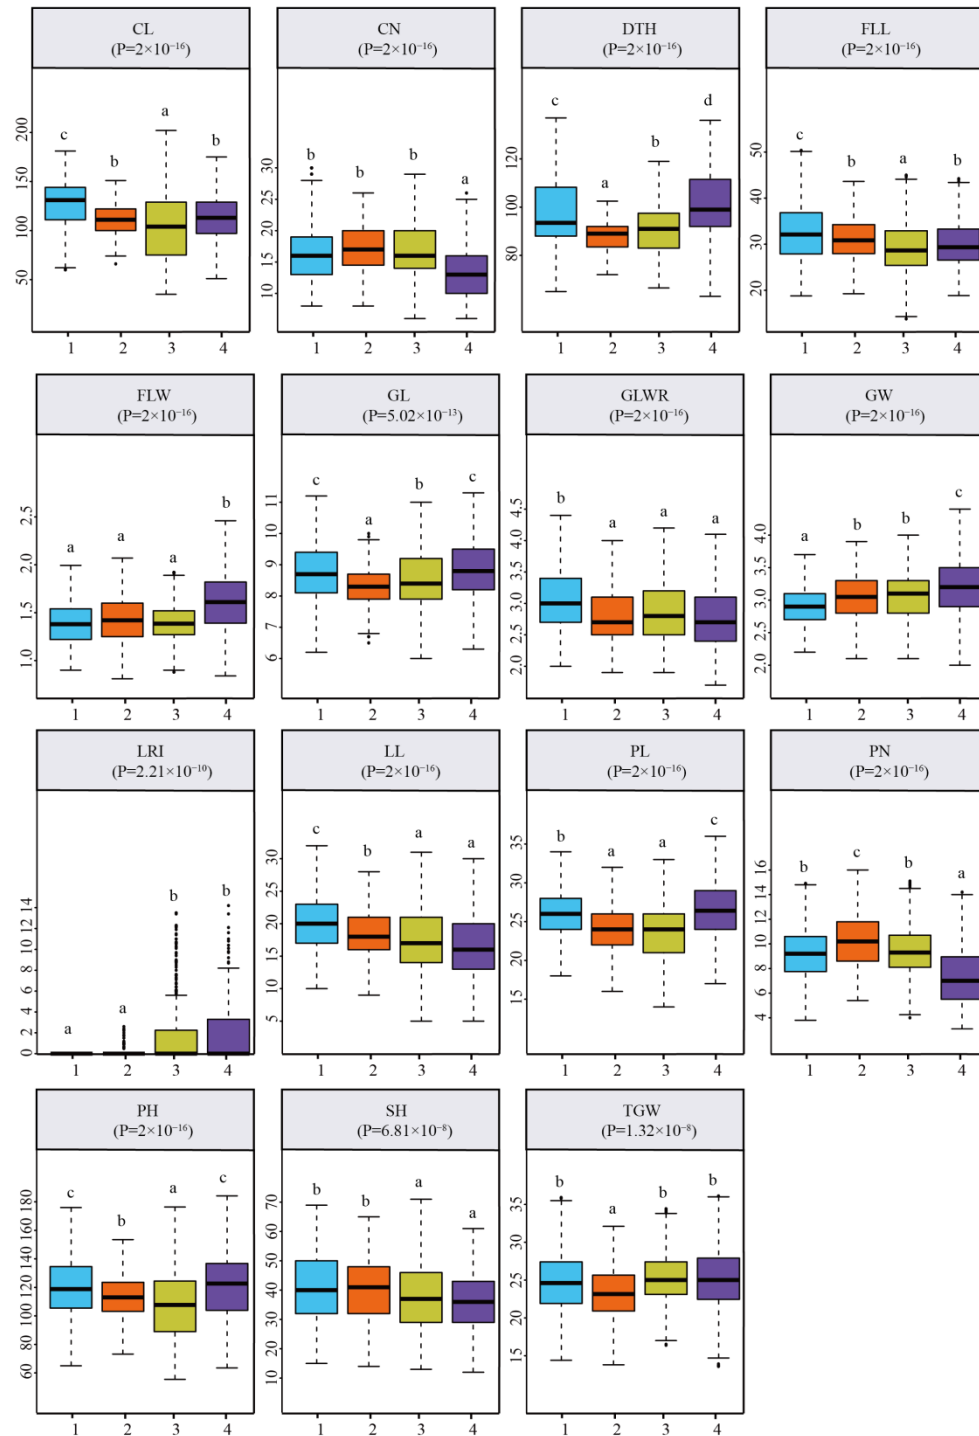

**Figure A15.** Comparison and analysis of 15 agronomic traits among the predominant gcHap, unfavorable gcHap, and major gcHaps of *OsCNGC11*

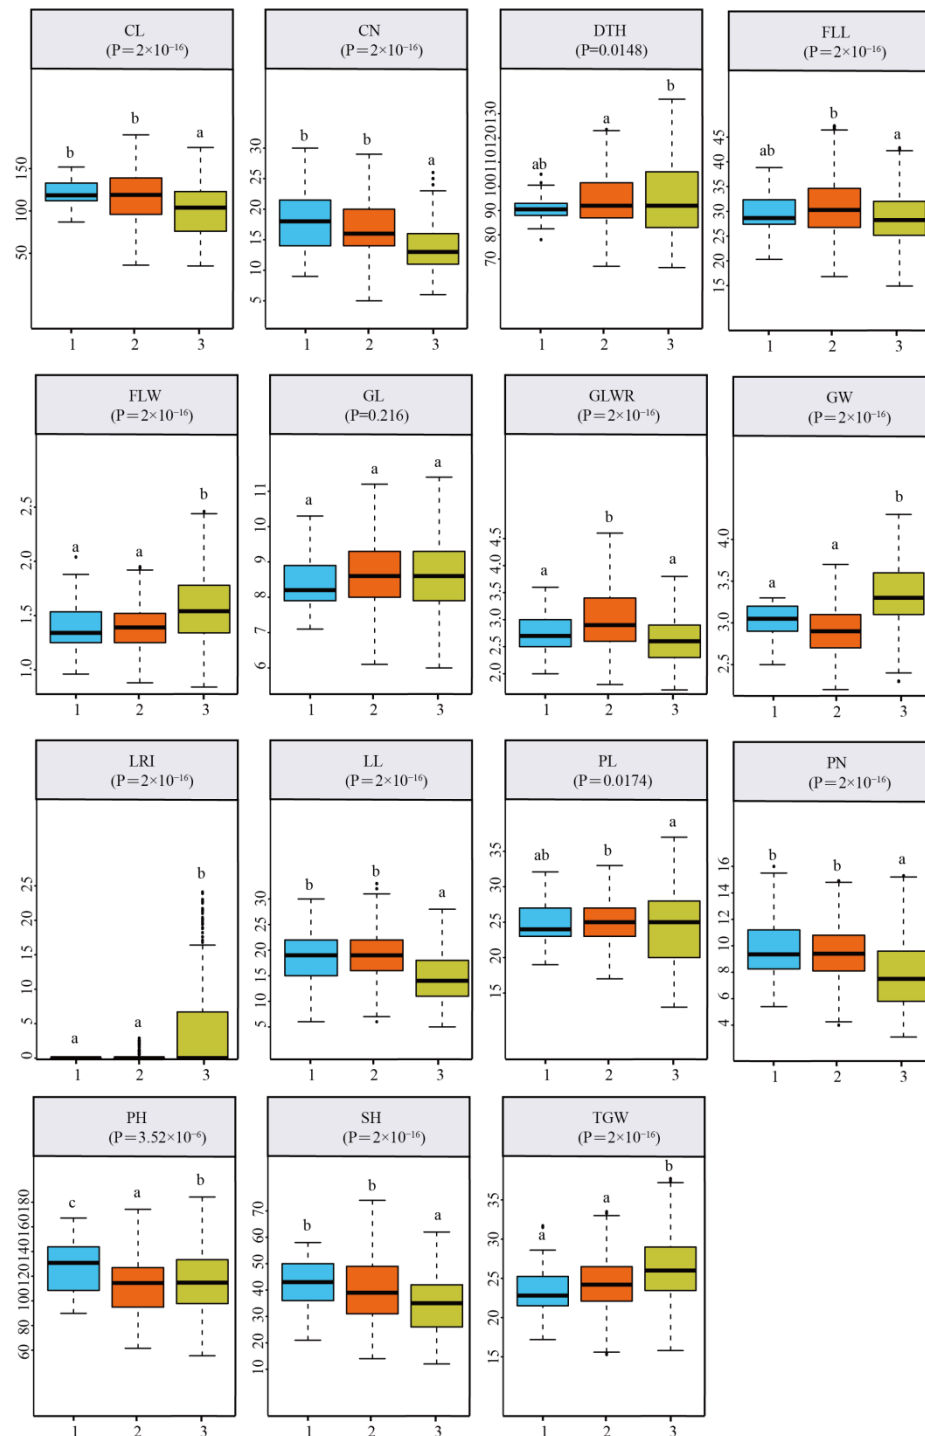

**Figure A16.** Comparison and analysis of 15 agronomic traits among the predominant gcHap, unfavorable gcHap, and major gcHaps of *OsCNGC12*

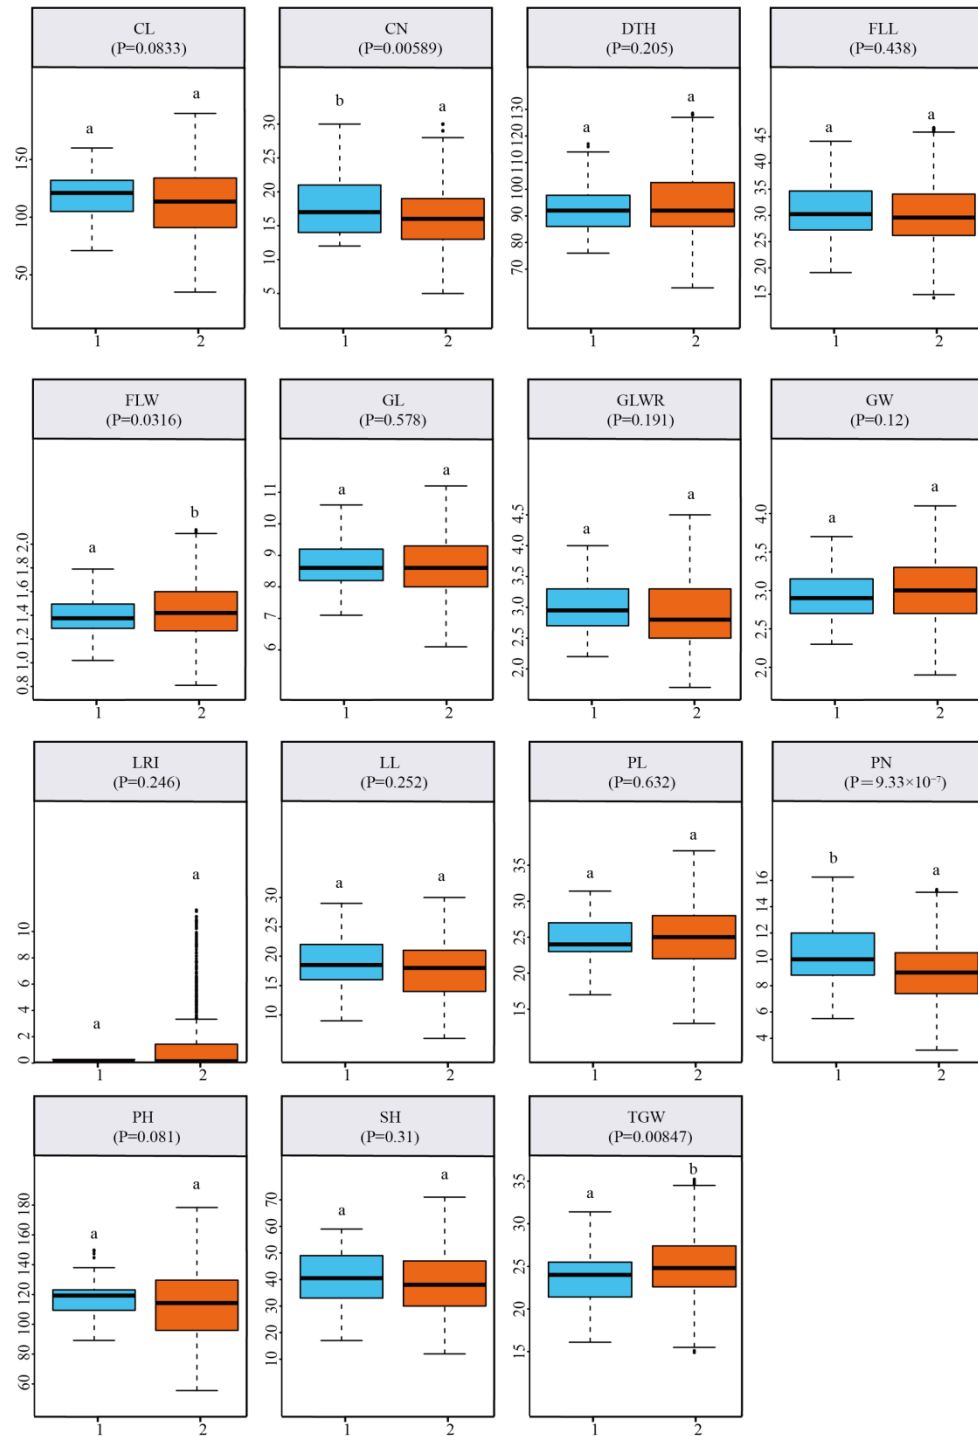

**Figure A17.** Comparison and analysis of 15 agronomic traits among the predominant gcHap, unfavorable gcHap, and major gcHaps of *OsCNGC13*

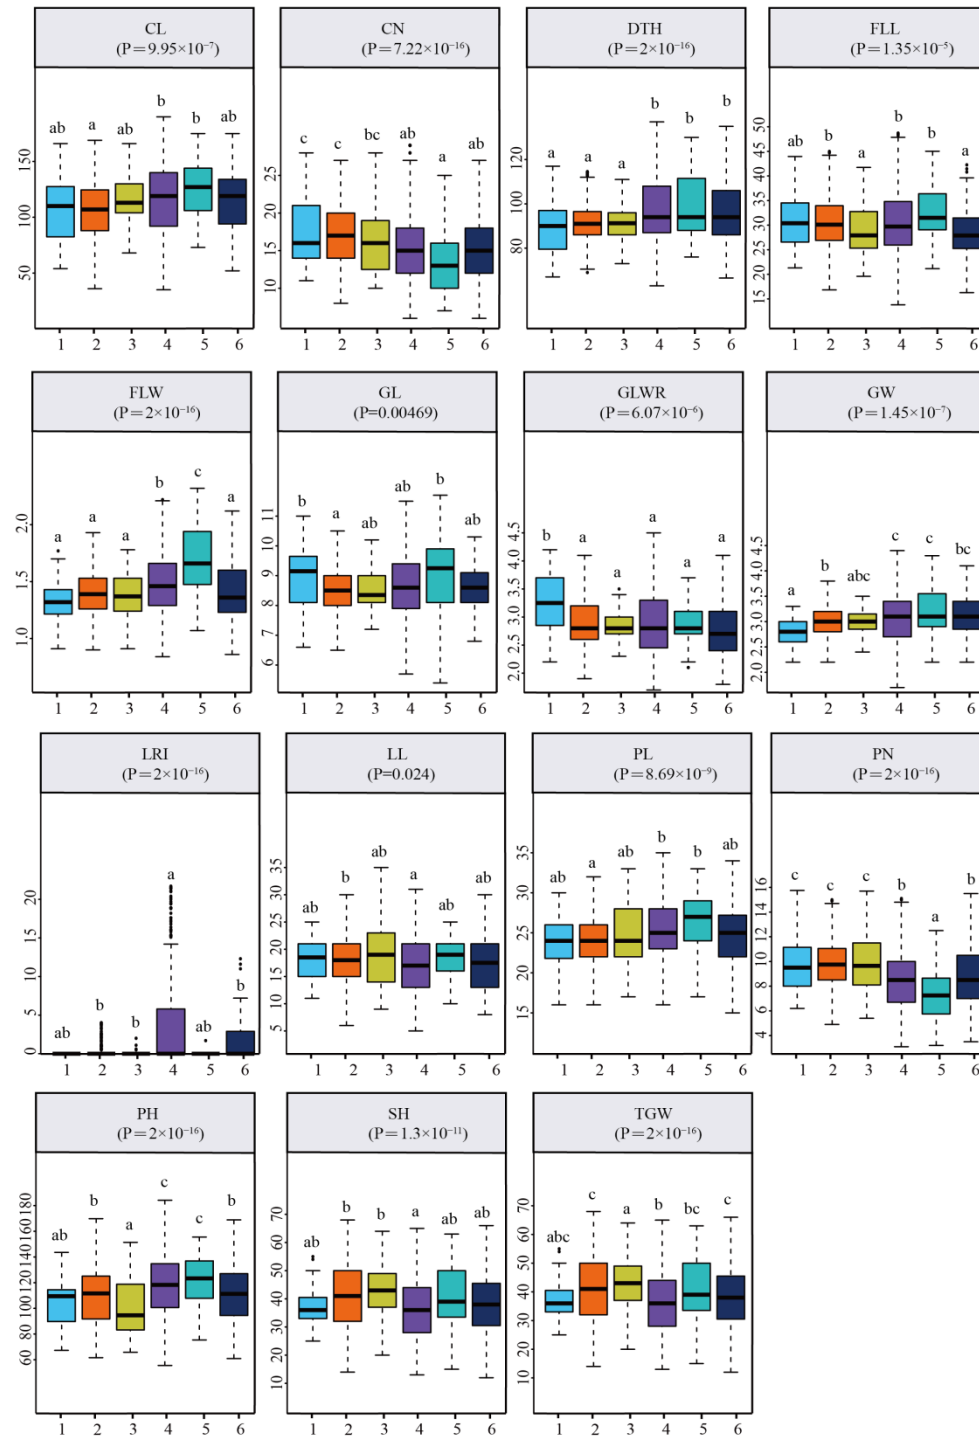

**Figure A18.** Comparison and analysis of 15 agronomic traits among the predominant gcHap, unfavorable gcHap, and major gcHaps of *OsCNGC14*

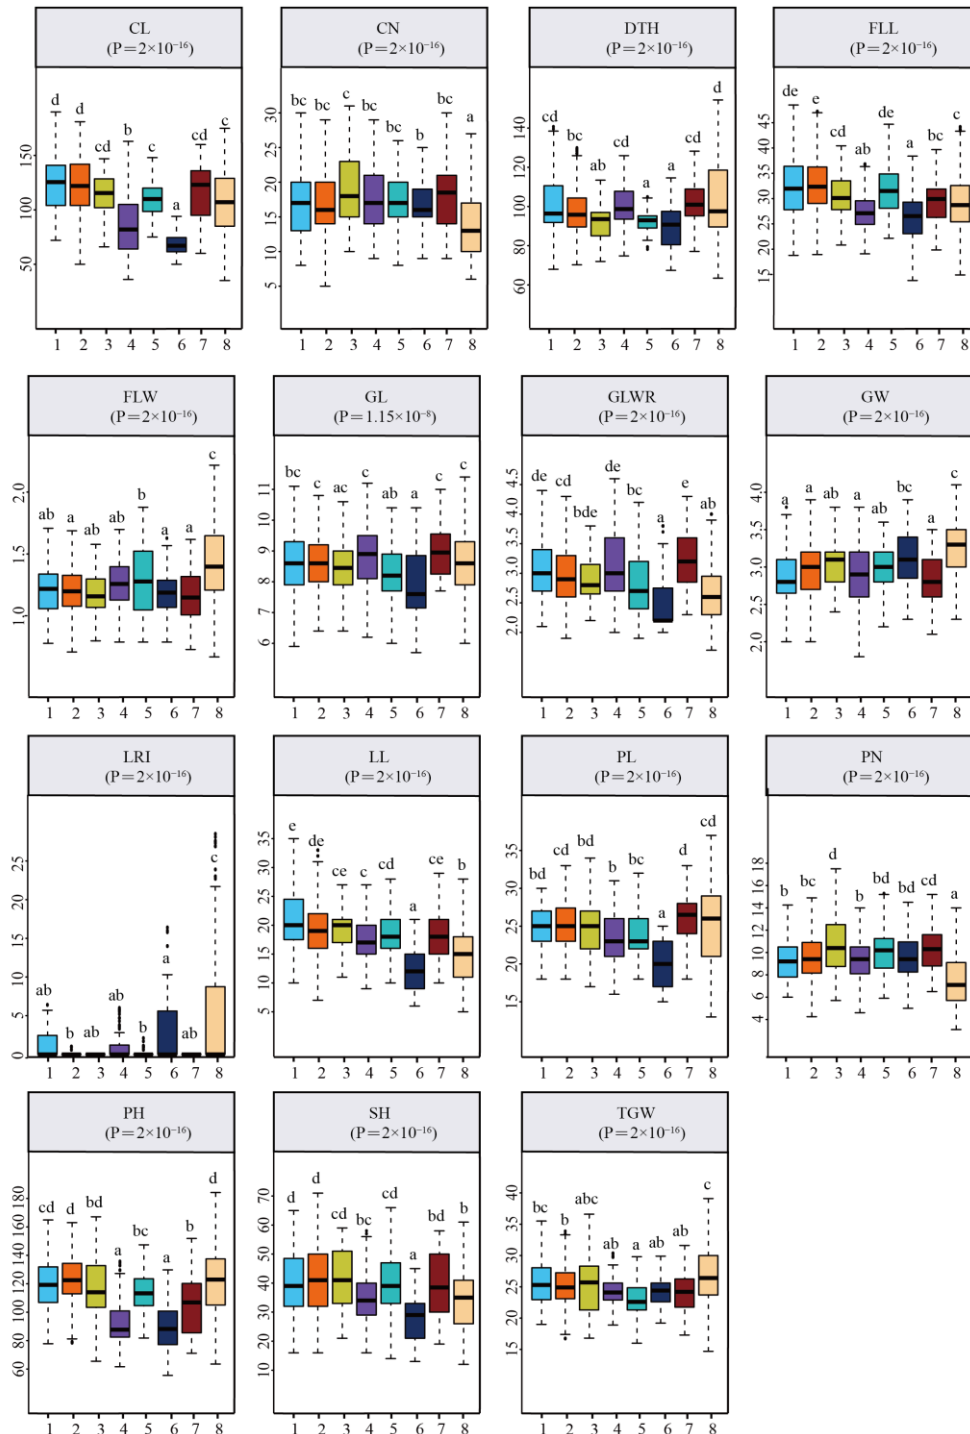

**Figure A19.** Comparison and analysis of 15 agronomic traits among the predominant gcHap, unfavorable gcHap, and major gcHaps of *OsCNGC15*

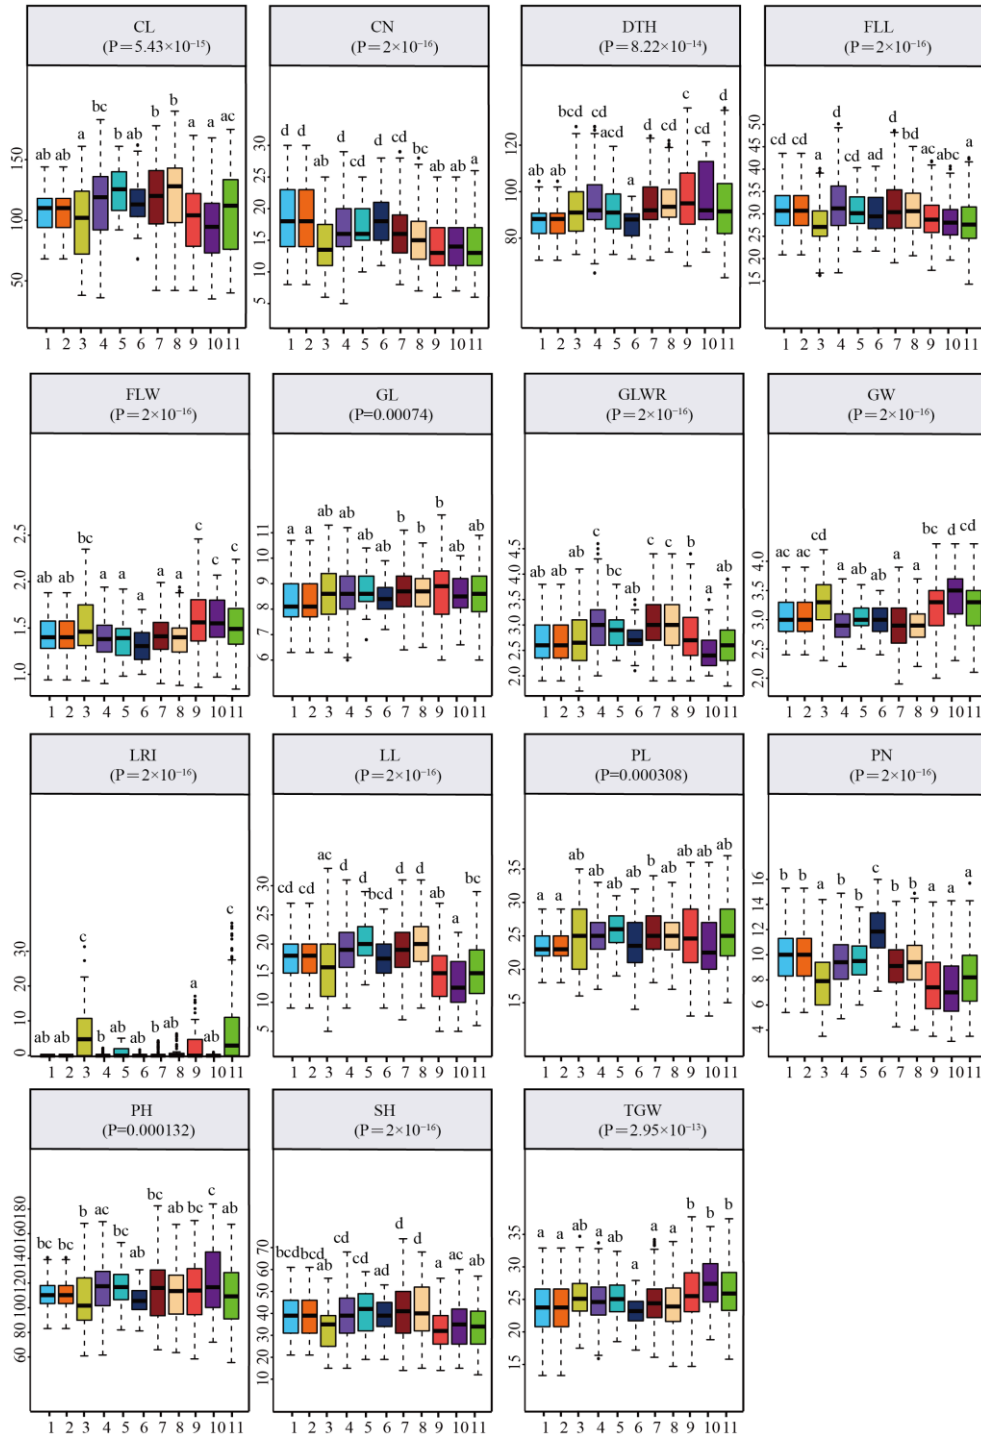

**Figure A20.** Comparison and analysis of 15 agronomic traits among the predominant gcHap, unfavorable gcHap, and major gcHaps of *OsCNGC16*
